# Supplementary material
Source: HighWire-hosted journal article supplement (https://www.genetics.org/content/suppl/2010/09/02/genetics.110.121822)
Supplement: FigureS8.pdf [file FigureS8.pdf]

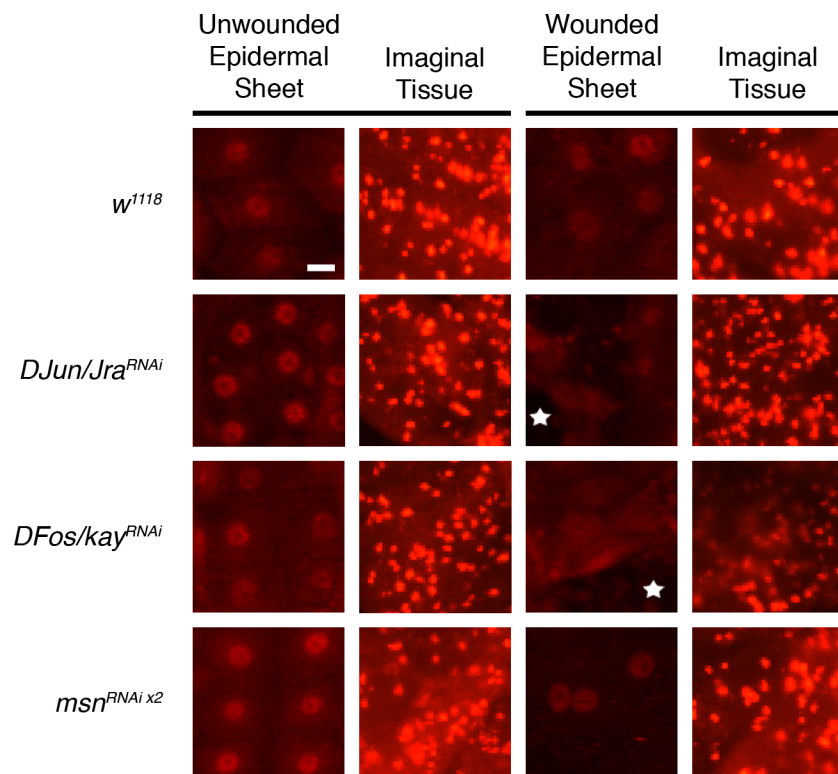

FIGURE S8. —Lack of epidermal cell division upon expression of select *UAS-RNAi* lines. Flies bearing *e22c-Gal4,UAS-src-GFP* were crossed to either *w<sup>1118</sup>* (control) or the indicated *UAS-RNAi* transgenes and stained with anti-phospho-Histone H3 (red) to assess the presence of mitotically active cells. Expression of *UAS-DJun/Jra<sup>RNAi</sup>*, *UAS-DFos/kay<sup>RNAi</sup>*, or *UAS-msn<sup>RNAi x2</sup>* in the larval epidermis did not affect the high level of staining observed in imaginal tissue and no intense anti-phospho-Histone H3 staining was observed in the larval epidermis of any of the genotypes either before or after wounding. Stars indicate pinch wound gaps in genotypes that gave open wounds. Scale bar 20  $\mu\text{m}$ .
